# Supplementary material for: Risks of Stroke and Mortality in Atrial Fibrillation Patients Treated With Rivaroxaban and Warfarin
Source: PubMed Central journal article supplement — Stroke. 2020 Jan 27;51(2):549–55. doi: 10.1161/STROKEAHA.119.025554 (PMC7004448; doi:10.1161/strokeaha.119.025554), 2020-01-27

SUPPLEMENTAL MATERIAL

Kaplan-Meier Survival Curves for Stroke Severity Outcomes (IA-ID) and Mortality Outcomes (IIA-II C)

(IA) Overall Stroke Outcome

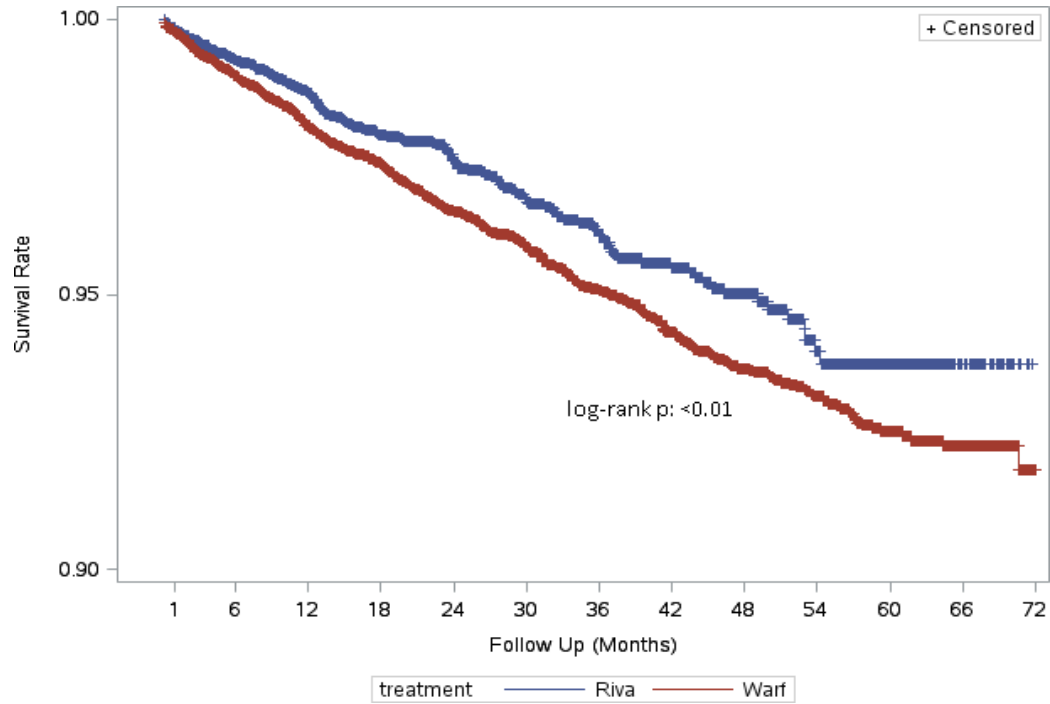

(IB) Minor Stroke.

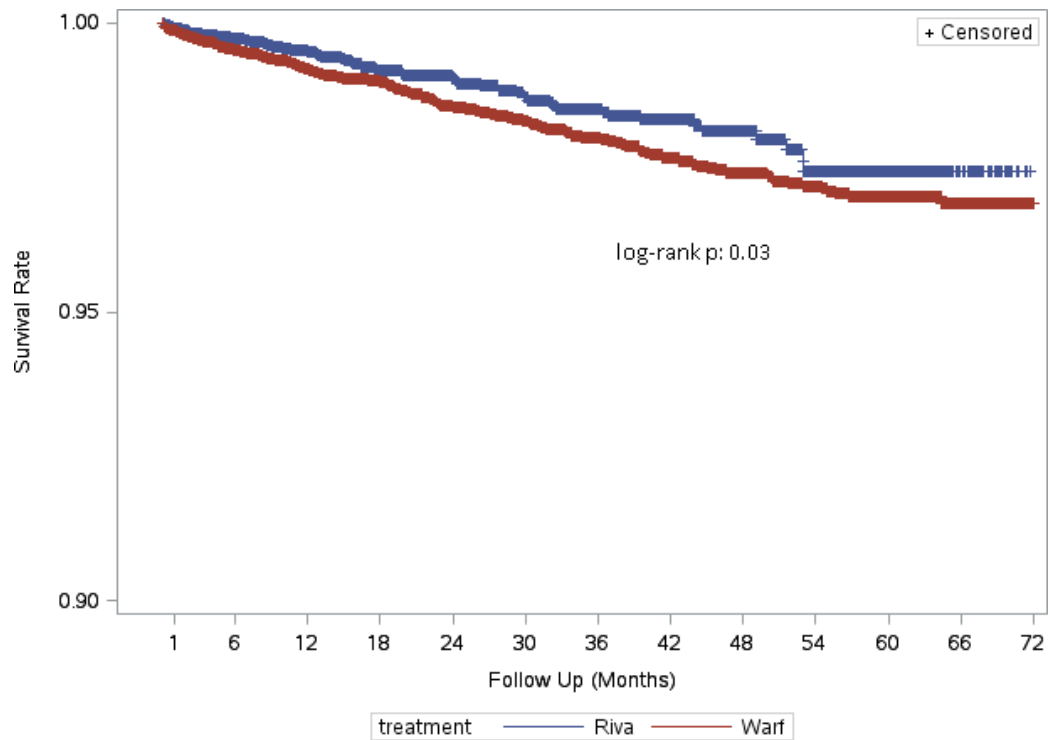

(IC) Moderate Stroke.

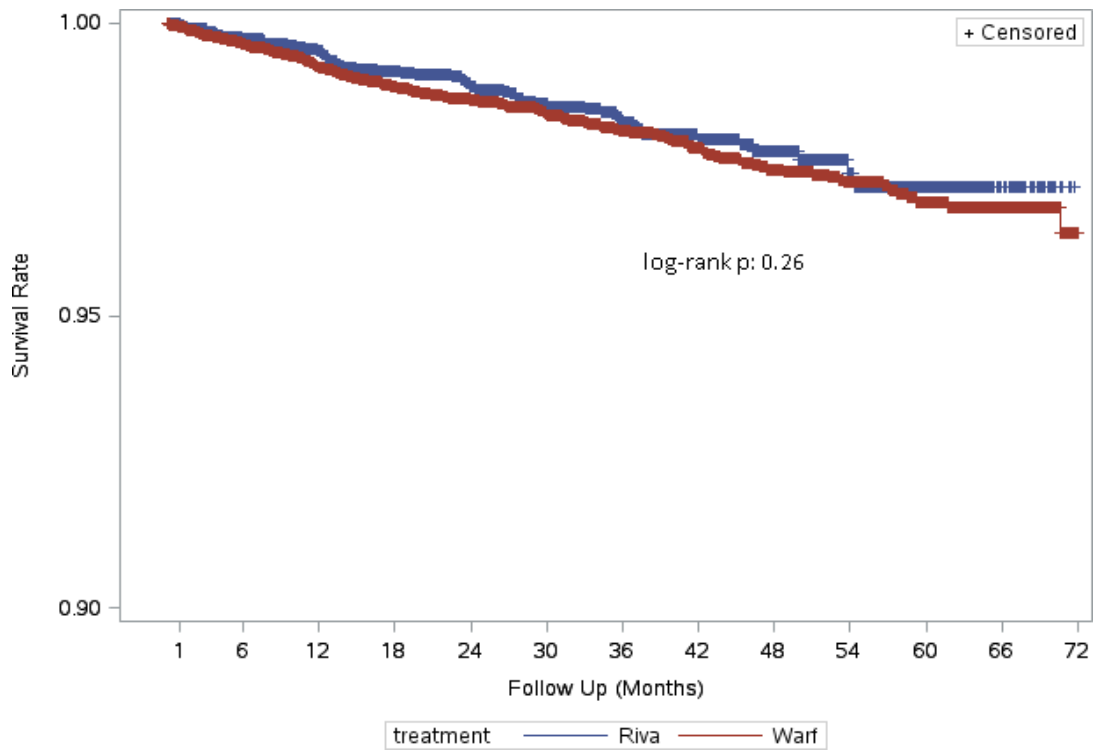

(ID) Severe Stroke.

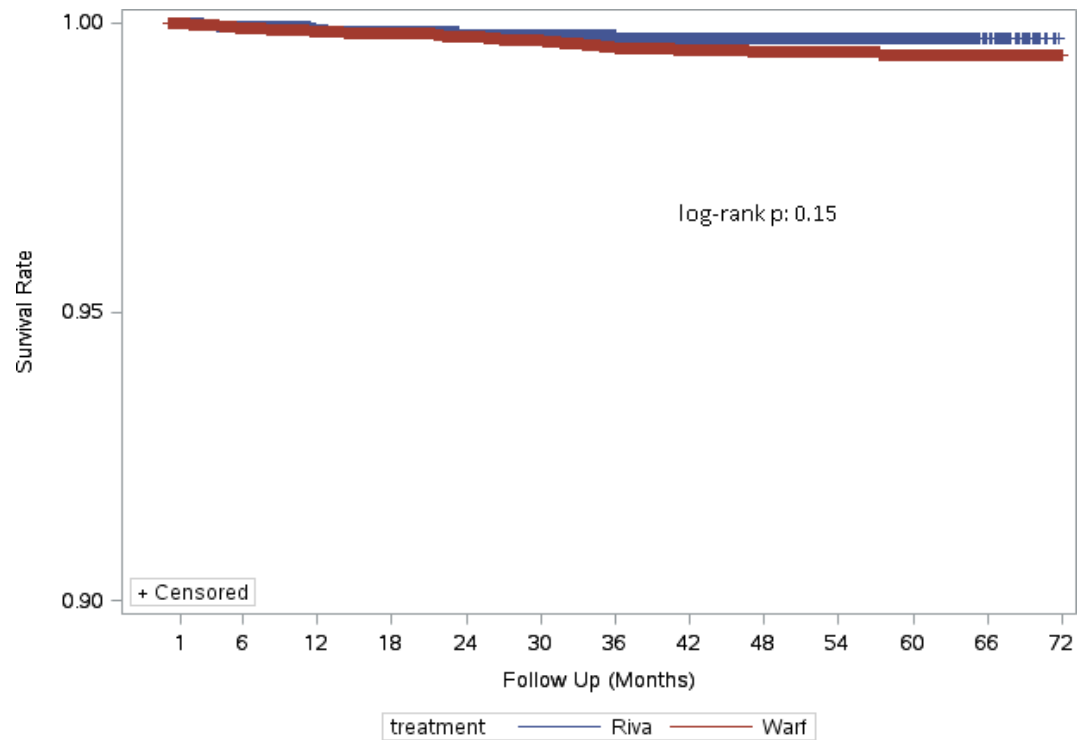

(IIA) All-Cause Mortality Following Treatment Initiation.

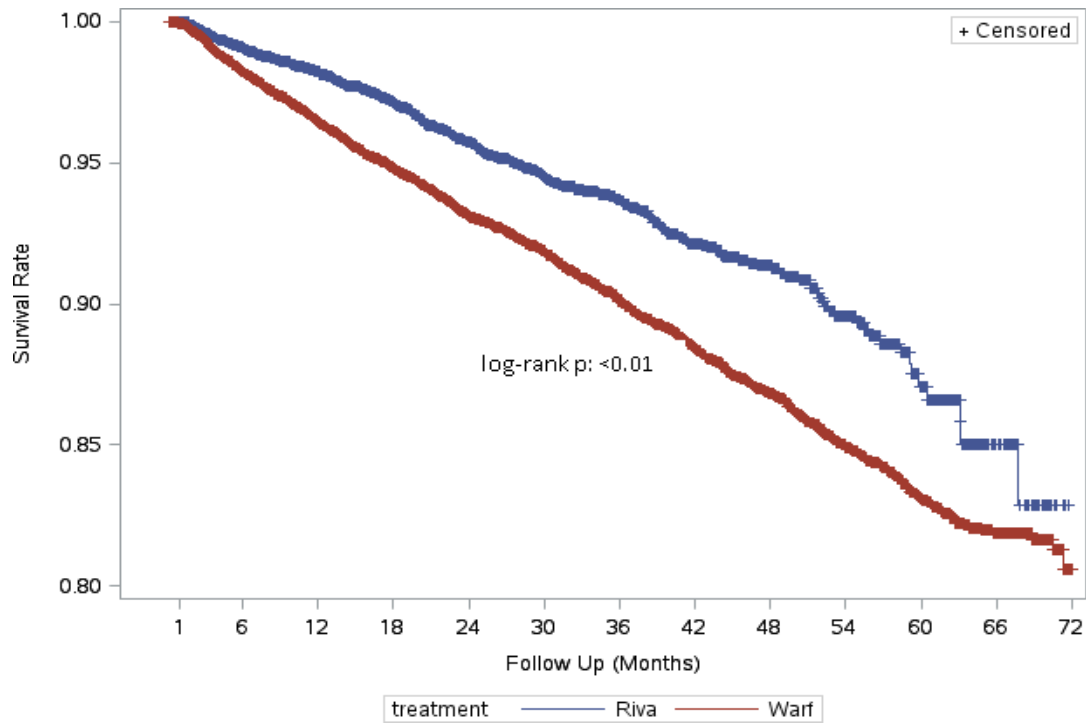

(IIB) All-Cause Mortality Post Stroke Occurrence.

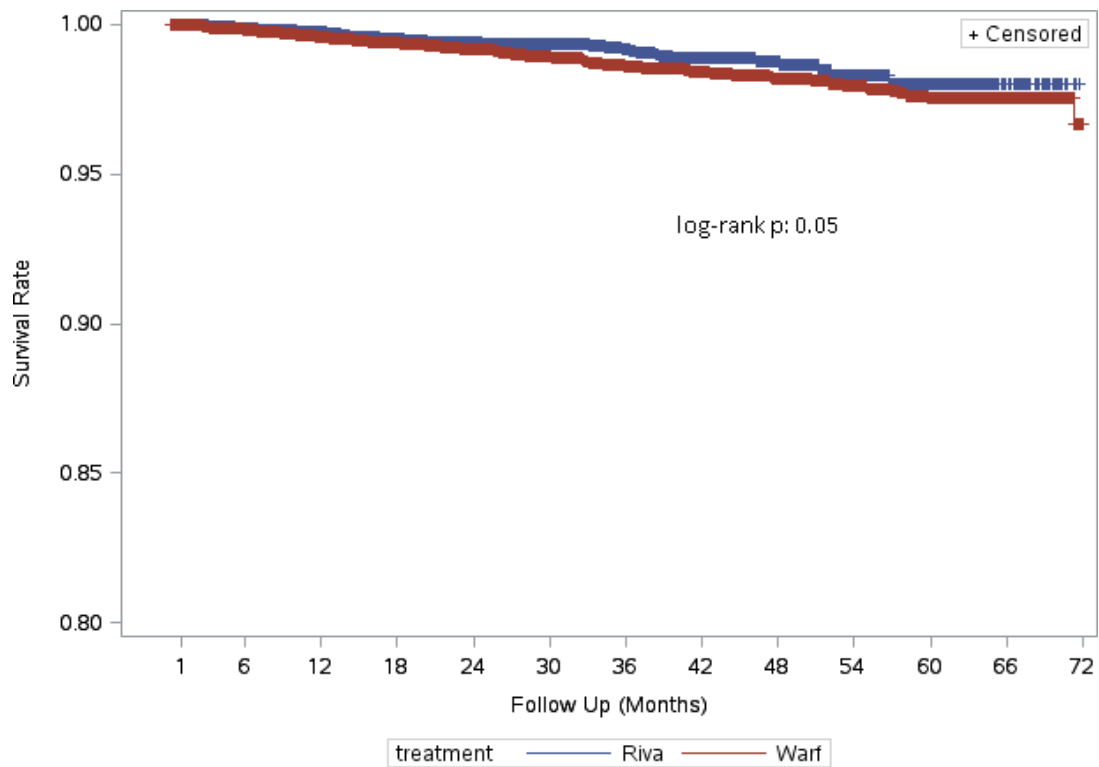

(IIC) All-Cause Mortality Within 30 Days Post Stroke

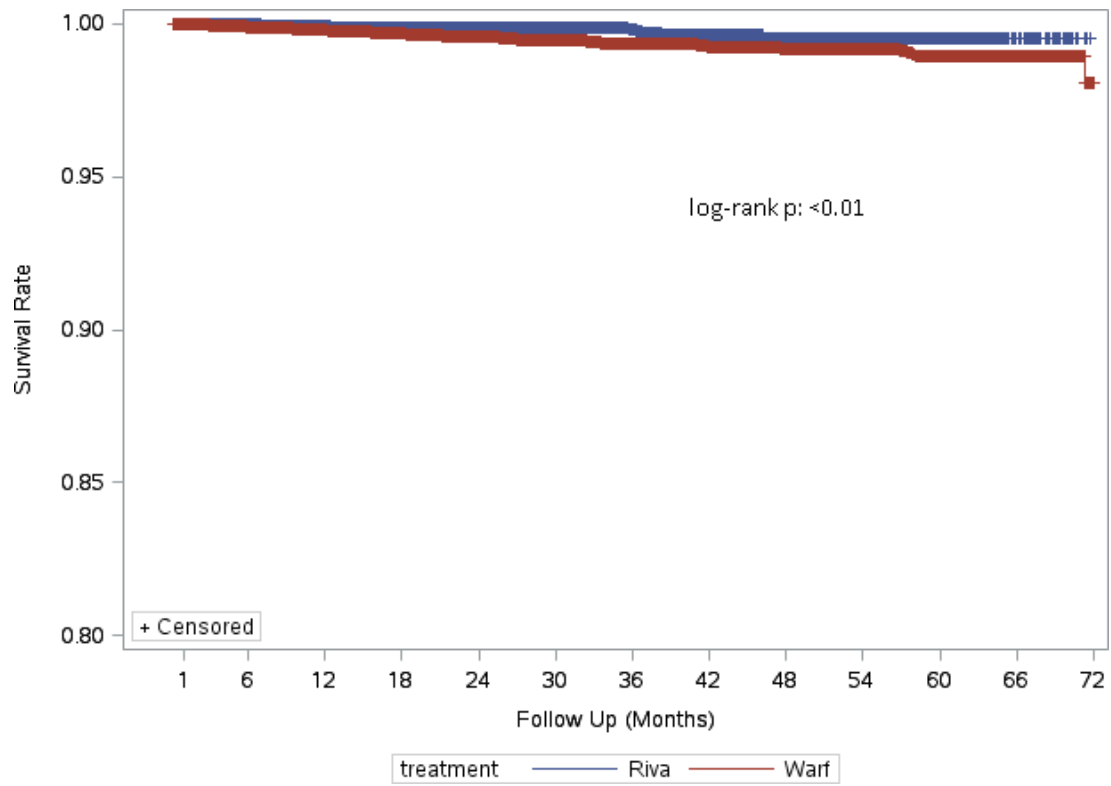

Supplement: str-51-549-s001.pdf [file str-51-549-s001.pdf]
