# Supplementary material for: Risks of Stroke and Mortality in Atrial Fibrillation Patients Treated With Rivaroxaban and Warfarin
Source: PubMed Central journal article supplement — Stroke. 2020 Jan 27;51(2):549–55. doi: 10.1161/STROKEAHA.119.025554 (PMC7004448; doi:10.1161/strokeaha.119.025554), 2020-01-27
Supplement: str-51-549-s002.pdf [file str-51-549-s002.pdf]

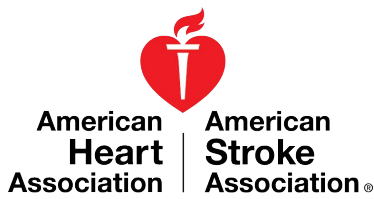

## Acknowledgment Permission Form

---

**Journal** Stroke

**Manuscript Number** STROKE/2019/025554R1

**First Author** Dejan Milentijevic

**Title of Work** Real-world comparative risks of stroke and mortality in patients with atrial fibrillation: rivaroxaban versus warfarin

Authors must provide written permission/approval from all individuals mentioned by name in the Acknowledgments section of a submitted manuscript. By signing this form, any and all acknowledged persons therefore state that they have read and approved the mention of their names in the Acknowledgment section of the aforementioned paper.

|           |                     |           |                     |      |                       |
|-----------|---------------------|-----------|---------------------|------|-----------------------|
| Name (1)  | <u>Deepti Bisht</u> | Signature | <u>Deepti Bisht</u> | Date | <u>27th June 2019</u> |
| Name (2)  | <u></u>             | Signature | <u></u>             | Date | <u></u>               |
| Name (3)  | <u></u>             | Signature | <u></u>             | Date | <u></u>               |
| Name (4)  | <u></u>             | Signature | <u></u>             | Date | <u></u>               |
| Name (5)  | <u></u>             | Signature | <u></u>             | Date | <u></u>               |
| Name (6)  | <u></u>             | Signature | <u></u>             | Date | <u></u>               |
| Name (7)  | <u></u>             | Signature | <u></u>             | Date | <u></u>               |
| Name (8)  | <u></u>             | Signature | <u></u>             | Date | <u></u>               |
| Name (9)  | <u></u>             | Signature | <u></u>             | Date | <u></u>               |
| Name (10) | <u></u>             | Signature | <u></u>             | Date | <u></u>               |
| Name (11) | <u></u>             | Signature | <u></u>             | Date | <u></u>               |
| Name (12) | <u></u>             | Signature | <u></u>             | Date | <u></u>               |
| Name (13) | <u></u>             | Signature | <u></u>             | Date | <u></u>               |
| Name (14) | <u></u>             | Signature | <u></u>             | Date | <u></u>               |
| Name (15) | <u></u>             | Signature | <u></u>             | Date | <u></u>               |
| Name (16) | <u></u>             | Signature | <u></u>             | Date | <u></u>               |
| Name (17) | <u></u>             | Signature | <u></u>             | Date | <u></u>               |
| Name (18) | <u></u>             | Signature | <u></u>             | Date | <u></u>               |
| Name (19) | <u></u>             | Signature | <u></u>             | Date | <u></u>               |
| Name (20) | <u></u>             | Signature | <u></u>             | Date | <u></u>               |

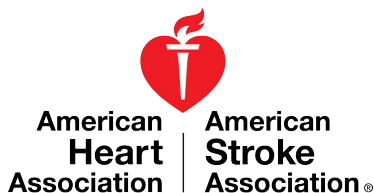

## Acknowledgment Permission Form

---

**Journal** Stroke

**Manuscript Number** STROKE/2019/025554R1

**First Author** Dejan Milentijevic

**Title of Work** Real-world comparative risks of stroke and mortality in patients with atrial fibrillation: rivaroxaban versus warfarin

Authors must provide written permission/approval from all individuals mentioned by name in the Acknowledgments section of a submitted manuscript. By signing this form, any and all acknowledged persons therefore state that they have read and approved the mention of their names in the Acknowledgment section of the aforementioned paper.

|           |                             |           |                             |      |                             |
|-----------|-----------------------------|-----------|-----------------------------|------|-----------------------------|
| Name (1)  | <u>Nancy Connolly</u>       | Signature | <u>Nancy Connolly</u>       | Date | <u>                    </u> |
| Name (2)  | <u>                    </u> | Signature | <u>                    </u> | Date | <u>                    </u> |
| Name (3)  | <u>                    </u> | Signature | <u>                    </u> | Date | <u>                    </u> |
| Name (4)  | <u>                    </u> | Signature | <u>                    </u> | Date | <u>                    </u> |
| Name (5)  | <u>                    </u> | Signature | <u>                    </u> | Date | <u>                    </u> |
| Name (6)  | <u>                    </u> | Signature | <u>                    </u> | Date | <u>                    </u> |
| Name (7)  | <u>                    </u> | Signature | <u>                    </u> | Date | <u>                    </u> |
| Name (8)  | <u>                    </u> | Signature | <u>                    </u> | Date | <u>                    </u> |
| Name (9)  | <u>                    </u> | Signature | <u>                    </u> | Date | <u>                    </u> |
| Name (10) | <u>                    </u> | Signature | <u>                    </u> | Date | <u>                    </u> |
| Name (11) | <u>                    </u> | Signature | <u>                    </u> | Date | <u>                    </u> |
| Name (12) | <u>                    </u> | Signature | <u>                    </u> | Date | <u>                    </u> |
| Name (13) | <u>                    </u> | Signature | <u>                    </u> | Date | <u>                    </u> |
| Name (14) | <u>                    </u> | Signature | <u>                    </u> | Date | <u>                    </u> |
| Name (15) | <u>                    </u> | Signature | <u>                    </u> | Date | <u>                    </u> |
| Name (16) | <u>                    </u> | Signature | <u>                    </u> | Date | <u>                    </u> |
| Name (17) | <u>                    </u> | Signature | <u>                    </u> | Date | <u>                    </u> |
| Name (18) | <u>                    </u> | Signature | <u>                    </u> | Date | <u>                    </u> |
| Name (19) | <u>                    </u> | Signature | <u>                    </u> | Date | <u>                    </u> |
| Name (20) | <u>                    </u> | Signature | <u>                    </u> | Date | <u>                    </u> |

Digitally signed by Nancy Connolly  
DN: cn=Nancy Connolly, o=American Heart Association, ou=American Heart Association, email=Nancy.Connolly@americanheart.org, c=US  
Reason: I agree to the terms stated by the signatory of the document  
Date: 2019.06.27 11:52:28 -0400  
Adobe Acrobat version: 10.0.0



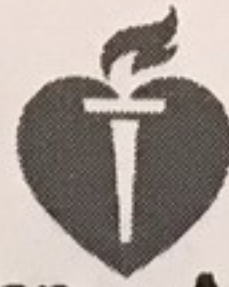

American Heart Association | American Stroke Association®

## Acknowledgment Permission Form

**Journal** Stroke

**Manuscript Number** STROKE/2019/025554R1

**First Author** Dejan Milentijevic

**Title of Work** Real-world comparative risks of stroke and mortality in patients with atrial fibrillation: rivaroxaban versus warfarin

Authors must provide written permission/approval from all individuals mentioned by name in the Acknowledgments section of a submitted manuscript. By signing this form, any and all acknowledged persons therefore state that they have read and approved the mention of their names in the Acknowledgment section of the aforementioned paper.

|           |                    |           |                                |      |                  |
|-----------|--------------------|-----------|--------------------------------|------|------------------|
| Name (1)  | <u>Zhijie Ding</u> | Signature | <u>[Handwritten Signature]</u> | Date | <u>6/27/2019</u> |
| Name (2)  | _____              | Signature | _____                          | Date | _____            |
| Name (3)  | _____              | Signature | _____                          | Date | _____            |
| Name (4)  | _____              | Signature | _____                          | Date | _____            |
| Name (5)  | _____              | Signature | _____                          | Date | _____            |
| Name (6)  | _____              | Signature | _____                          | Date | _____            |
| Name (7)  | _____              | Signature | _____                          | Date | _____            |
| Name (8)  | _____              | Signature | _____                          | Date | _____            |
| Name (9)  | _____              | Signature | _____                          | Date | _____            |
| Name (10) | _____              | Signature | _____                          | Date | _____            |
| Name (11) | _____              | Signature | _____                          | Date | _____            |
| Name (12) | _____              | Signature | _____                          | Date | _____            |
| Name (13) | _____              | Signature | _____                          | Date | _____            |
| Name (14) | _____              | Signature | _____                          | Date | _____            |
| Name (15) | _____              | Signature | _____                          | Date | _____            |
| Name (16) | _____              | Signature | _____                          | Date | _____            |
| Name (17) | _____              | Signature | _____                          | Date | _____            |
| Name (18) | _____              | Signature | _____                          | Date | _____            |
| Name (19) | _____              | Signature | _____                          | Date | _____            |
| Name (20) | _____              | Signature | _____                          | Date | _____            |



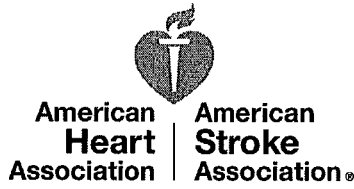

## Acknowledgment Permission Form

---

**Journal** Stroke

**Manuscript Number** STROKE/2019/025554R1

**First Author** Dejan Milentijevic

**Title of Work** Real-world comparative risks of stroke and mortality in patients with atrial fibrillation: rivaroxaban versus warfarin

Authors must provide written permission/approval from all individuals mentioned by name in the Acknowledgments section of a submitted manuscript. By signing this form, any and all acknowledged persons therefore state that they have read and approved the mention of their names in the Acknowledgment section of the aforementioned paper.

|           |                       |           |                       |      |                |
|-----------|-----------------------|-----------|-----------------------|------|----------------|
| Name (1)  | <u>Ashley O'Dunne</u> | Signature | <u>Ashley O'Dunne</u> | Date | <u>6/27/19</u> |
| Name (2)  | _____                 | Signature | _____                 | Date | _____          |
| Name (3)  | _____                 | Signature | _____                 | Date | _____          |
| Name (4)  | _____                 | Signature | _____                 | Date | _____          |
| Name (5)  | _____                 | Signature | _____                 | Date | _____          |
| Name (6)  | _____                 | Signature | _____                 | Date | _____          |
| Name (7)  | _____                 | Signature | _____                 | Date | _____          |
| Name (8)  | _____                 | Signature | _____                 | Date | _____          |
| Name (9)  | _____                 | Signature | _____                 | Date | _____          |
| Name (10) | _____                 | Signature | _____                 | Date | _____          |
| Name (11) | _____                 | Signature | _____                 | Date | _____          |
| Name (12) | _____                 | Signature | _____                 | Date | _____          |
| Name (13) | _____                 | Signature | _____                 | Date | _____          |
| Name (14) | _____                 | Signature | _____                 | Date | _____          |
| Name (15) | _____                 | Signature | _____                 | Date | _____          |
| Name (16) | _____                 | Signature | _____                 | Date | _____          |
| Name (17) | _____                 | Signature | _____                 | Date | _____          |
| Name (18) | _____                 | Signature | _____                 | Date | _____          |
| Name (19) | _____                 | Signature | _____                 | Date | _____          |
| Name (20) | _____                 | Signature | _____                 | Date | _____          |
