# Supplementary material for: Risks of Stroke and Mortality in Atrial Fibrillation Patients Treated With Rivaroxaban and Warfarin
Source: PubMed Central journal article supplement — Stroke. 2020 Jan 27;51(2):549–55. doi: 10.1161/STROKEAHA.119.025554 (PMC7004448; doi:10.1161/strokeaha.119.025554), 2020-01-27
Supplement: str-51-549-s003.pdf [file str-51-549-s003.pdf]

November 11, 2019

**Erinn Cain**

Assistant Managing Editor, *Stroke*  
**American Heart Association**  
200 5<sup>th</sup> Avenue | Waltham | MA | 02451

Dear Erinn,

Regarding the article entitled "Risks of stroke and mortality in atrial fibrillation patients treated with rivaroxaban and warfarin," on behalf of Janssen Scientific Affairs, LLC, I grant the American Heart Association, Inc., and Wolters Kluwer, during the full term of copyright, a non-exclusive license of all rights of copyright in and to the Contribution for the full term of copyright throughout the world as specified in paragraph C of the CC-BY-NC-ND agreement that was signed by the authors.

Sincerely,

A handwritten signature in black ink, appearing to read 'Brahim Bookhart', with a long horizontal flourish extending to the right.

Brahim Bookhart, MBA, MPH  
Senior Director, Real-World Value and Evidence  
Janssen Scientific Affairs, LLC  
Email: [BBookhar@its.inj.com](mailto:BBookhar@its.inj.com)
